# Supplementary material for: The proposed systemic thermogenic metabolites succinate and 12,13-diHOME are inversely associated with adiposity and related metabolic traits: evidence from a large human cross-sectional study
Source: Springer Nature journal article supplement (doi:10.1007/s00125-019-4947-5), 2019-07-15
Supplement: MOESM1 [file 16929242]

**ESM Table 1. Age-, sex-, and total fat mass-adjusted associations between succinate levels and metabolic and body composition markers.**

|                              | 12,13 diHOME          |                      | Succinate            |                      |
|------------------------------|-----------------------|----------------------|----------------------|----------------------|
|                              | $\beta$ (95%CI)       | P value              | $\beta$ (95%CI)      | P value              |
| z-Systolic BP                | -0.02 (-0.08, 0.04)   | 0.54                 | 0.11 (0.004, 0.22)   | 0.04                 |
| z-Diastolic BP               | -0.05 (-0.11, 0.01)   | 0.09                 | 0.10 (-0.01, 0.21)   | 0.09                 |
| <i>Biochemistry</i>          |                       |                      |                      |                      |
| z-Glucose                    | -0.10 (-0.17, -0.04)  | 0.001                | -0.07 (-0.18, 0.05)  | 0.27                 |
| z-Insulin                    | -0.05 (-0.11, 0.01)   | 0.08                 | 0.01 (-0.10, 0.11)   | 0.92                 |
| z-HOMA IR                    | -0.06 (-0.12, -0.004) | 0.035                | -0.01 (-0.12, 0.10)  | 0.85                 |
| z-Triglyceride               | -0.08 (-0.14, -0.02)  | 0.012                | -0.02 (-0.13, 0.10)  | 0.77                 |
| z-Total Cholesterol          | -0.05 (-0.11, 0.02)   | 0.13                 | 0.06 (-0.06, 0.18)   | 0.31                 |
| z-HDL-cholesterol            | 0.11 (0.05, 0.17)     | $1.8 \times 10^{-4}$ | 0.08 (-0.03, 0.18)   | 0.15                 |
| z-NEFA                       | 0.16 (0.09, 0.22)     | $3.9 \times 10^{-6}$ | 0.20 (0.08, 0.32)    | 0.001                |
| z-Glycerol                   | 0.17 (0.11, 0.23)     | 0.006                | 0.32 (0.21, 0.44)    | $2.4 \times 10^{-8}$ |
| z- $\beta$ -hydroxy butyrate | 0.12 (0.05, 0.18)     | $3.1 \times 10^{-5}$ | 0.10 (-0.02, 0.23)   | 0.11                 |
| z-Lactate                    | -0.04 (-0.09, 0.03)   | 0.25                 | 0.24 (0.12, 0.36)    | $8.4 \times 10^{-6}$ |
| <i>DXA-body composition</i>  |                       |                      |                      |                      |
| z-Visceral fat               | -0.03 (-0.06, 0.01)   | 0.12                 | -0.003 (-0.07, 0.06) | 0.94                 |
| z-Total lean mass            | 0.02 (-0.01, 0.06)    | 0.23                 | 0.04 (-0.03, 0.11)   | 0.25                 |

Linear regression model adjusted for age, sex and total fat mass.  $\beta$ -values represent a S.D. change in 12,13-diHOME/Succinate with corresponding S.D. change in metabolic and body composition traits.

**ESM Table 2. Age- and sex and physical activity-adjusted associations between succinate levels and metabolic and body composition markers**

|                              | 12,13 diHOME          |                       | Succinate            |                       |
|------------------------------|-----------------------|-----------------------|----------------------|-----------------------|
|                              | $\beta$ (95%CI)       | P value               | $\beta$ (95%CI)      | P value               |
| z-Weight                     | -0.03 (-0.09, 0.02)   | 0.23                  | -0.07 (-0.18, 0.03)  | 0.17                  |
| z-BMI                        | -0.06 (-0.12, -0.002) | 0.043                 | -0.09 (-0.21, 0.03)  | 0.14                  |
| z-Systolic blood pressure    | 0.04 (-0.10, -0.01)   | 0.13                  | 0.09 (-0.02, 0.20)   | 0.11                  |
| z-Diastolic blood pressure   | -0.08 (-0.14, -0.02)  | 0.01                  | 0.07 (-0.05, 0.18)   | 0.24                  |
| <i>Biochemistry</i>          |                       |                       |                      |                       |
| z-Glucose                    | -0.10 (-0.16, -0.04)  | 0.001                 | -0.09 (-0.20, 0.03)  | 0.16                  |
| z-Insulin                    | -0.07 (-0.13, -0.01)  | 0.027                 | -0.03 (-0.15, 0.09)  | 0.58                  |
| z-HOMA IR                    | -0.08 (-0.14, -0.02)  | 0.013                 | -0.05 (-0.17, 0.07)  | 0.43                  |
| z-Triglyceride               | -0.08 (-0.14, -0.02)  | 0.007                 | -0.04 (-0.15, 0.08)  | 0.54                  |
| z-Total Cholesterol          | -0.06 (-0.11, 0.01)   | 0.07                  | 0.05 (-0.06, 0.17)   | 0.39                  |
| z-HDL-cholesterol            | 0.11 (0.05, 0.16)     | $2.9 \times 10^{-03}$ | 0.10 (-0.01, 0.21)   | 0.08                  |
| z-NEFA                       | 0.11 (0.05, 0.18)     | $4.2 \times 10^{-03}$ | 0.19 (0.07, 0.31)    | 0.002                 |
| z-Glycerol                   | 0.15 (0.09, 0.21)     | $5.8 \times 10^{-07}$ | 0.30 (0.18, 0.42)    | $4.73 \times 10^{-7}$ |
| z- $\beta$ -hydroxy butyrate | 0.12 (0.06, 0.18)     | $2.6 \times 10^{-03}$ | 0.10 (-0.02, 0.22)   | 0.11                  |
| z-Lactate                    | -0.05 (-0.22, 0.01)   | 0.12                  | 0.21 (0.09, 0.33)    | 0.001                 |
| <i>DXA-body composition</i>  |                       |                       |                      |                       |
| z-Total fat mass             | -0.05 (-0.11, 0.01)   | 0.13                  | -0.11 (-0.23, 0.01)  | 0.06                  |
| z-Total fat percentage       | -0.06 (-0.11, -0.009) | 0.022                 | -0.13 (-0.23, -0.03) | 0.014                 |
| z-Visceral fat               | -0.07 (-0.12, -0.01)  | 0.017                 | -0.08 (-0.18, 0.03)  | 0.16                  |
| z-Total lean mass            | -0.002 (-0.04, 0.03)  | 0.92                  | -0.002 (-0.08, 0.07) | 0.96                  |

Linear regression model adjusted for age and sex.  $\beta$ -values represent a SD change in 12,13-diHOME/Succinate with corresponding SD change in metabolic and body composition traits.

**ESM Table 3. Age-, sex-, physical activity and total fat mass-adjusted associations between succinate levels and metabolic and body composition markers.**

|                              | 12,13 diHOME          |                       | Succinate           |                      |
|------------------------------|-----------------------|-----------------------|---------------------|----------------------|
|                              | $\beta$ (95%CI)       | P value               | $\beta$ (95%CI)     | P value              |
| z-Systolic BP                | -0.03 (-0.09, 0.02)   | 0.28                  | 0.12 (0.01, 0.23)   | 0.04                 |
| z-Diastolic BP               | -0.06 (-0.12, -0.00)  | 0.048                 | 0.11 (-0.003, 0.22) | 0.06                 |
| <i>Biochemistry</i>          |                       |                       |                     |                      |
| z-Glucose                    | -0.09 (-0.15, -0.03)  | 0.004                 | -0.06 (-0.17, 0.06) | 0.35                 |
| z-Insulin                    | -0.05 (-0.10, 0.01)   | 0.13                  | 0.02 (-0.09, 0.13)  | 0.74                 |
| z-HOMA IR                    | -0.05 (-0.11, 0.004)  | 0.07                  | 0.002 (-0.11, 0.12) | 0.96                 |
| z-Triglyceride               | -0.06 (-0.12, -0.006) | 0.03                  | 0.002 (-0.11, 0.11) | 0.97                 |
| z-Total Cholesterol          | -0.04 (-0.10, 0.02)   | 0.15                  | 0.08 (-0.04, 0.19)  | 0.20                 |
| z-HDL-cholesterol            | 0.09 (0.03, 0.14)     | 0.002                 | 0.06 (-0.05, 0.17)  | 0.27                 |
| z-NEFA                       | 0.12 (0.06, 0.18)     | $1.2 \times 10^{-05}$ | 0.21 (0.08, 0.33)   | 0.001                |
| z-Glycerol                   | 0.17 (0.11, 0.23)     | $3.6 \times 10^{-08}$ | 0.33 (0.21, 0.44)   | $2.4 \times 10^{-8}$ |
| z- $\beta$ -hydroxy butyrate | 0.11 (0.05, 0.18)     | $3.9 \times 10^{-05}$ | 0.09 (-0.02, 0.21)  | 0.13                 |
| z-Lactate                    | -0.04 (-0.09, 0.02)   | 0.24                  | 0.24 (0.12, 0.36)   | $8.4 \times 10^{-6}$ |
| <i>DXA-body composition</i>  |                       |                       |                     |                      |
| z-Visceral fat               | -0.02 (-0.06, 0.02)   | 0.26                  | 0.01 (-0.06, 0.09)  | 0.73                 |
| z-Total lean mass            | 0.004 (-0.03, 0.04)   | 0.82                  | 0.01 (-0.06, 0.08)  | 0.76                 |

Linear regression model adjusted for age, sex and total fat mass.  $\beta$ -values represent a S.D. change in 12,13-diHOME/Succinate with corresponding S.D. change in metabolic and body composition traits.
